# Supplementary material for: Transcriptomic Analysis of Circulating Leukocytes Obtained during the Recovery from Clinical Mastitis Caused by Escherichia coli in Holstein Dairy Cows
Source: MDPI journal article supplement (doi:10.3390/ani12162146), 2022-08-21
Supplement: s1 [file s1]

**Supplementary Table S5.** Common genetic variants between *E. coli* +ve and *E. coli* -ve cows. Only variants with a minor allele frequency (MAF) > 0.8 were included. This implied that, in either the *E. coli*(+) or *E. coli*(-) group, over 80% of the cows had to have a variant differing from the allele most commonly present in the *Bos taurus* population. Secondly, the variant had to be present in ≥8 of the 9 cows in one group but in ≤1 of the 9 cows in the other group. (A) Ranked based on MAF > 0.8 in *E. coli*(-) cows (56 variants); (B) Ranked based on MAF > 0.8 in *E. coli*(+) cows (38 variants). Asterisks indicate genes present in both groups A and B.

**A**

| CHR            | SNP       | MAF pos | REF | ALT | No pos_ID | MAF neg | No neg_ID | Gene      |
|----------------|-----------|---------|-----|-----|-----------|---------|-----------|-----------|
| NC_037330.1    | 9582229   | 0.056   | T   | G   | 9         | 0.944   | 9         | IGSF8*    |
| NC_037332.1    | 68183061  | 0.056   | T   | A   | 9         | 0.944   | 9         | CHST11*   |
| NC_037336.1    | 31758597  | 0.056   | G   | A   | 9         | 0.944   | 9         | MAN1A1    |
| NC_037334.1    | 70585950  | 0.063   | G   | T   | 8         | 0.833   | 9         | EBF1*     |
| NC_037343.1    | 4352208   | 0.063   | T   | A   | 8         | 0.889   | 9         | RASSF5    |
| NC_037350.1    | 7314809   | 0.063   | T   | G   | 8         | 0.889   | 9         | BOLA-DOA  |
| NC_037343.1    | 67418274  | 0.063   | A   | G   | 8         | 0.944   | 9         | TPR*      |
| NC_037343.1    | 67431369  | 0.063   | C   | G   | 8         | 0.944   | 9         | TPR*      |
| NC_037348.1    | 69243133  | 0.063   | G   | T   | 8         | 0.944   | 9         | AKT1*     |
| NC_037330.1    | 16028613  | 0.063   | C   | G   | 8         | 1       | 9         | UBE2Q1    |
| NC_037333.1    | 58212143  | 0.111   | C   | A   | 9         | 0.813   | 8         | TMEM156*  |
| NC_037332.1    | 98033207  | 0.111   | T   | A   | 9         | 0.938   | 8         | ETV6*     |
| NC_037332.1    | 116848067 | 0.125   | A   | G   | 8         | 0.833   | 9         | GRAMD4    |
| NC_037337.1    | 87461439  | 0.125   | A   | T   | 8         | 0.938   | 8         | GPATCH2L  |
| NC_037329.1    | 120195498 | 0.167   | A   | G   | 9         | 0.833   | 9         | EIF4E2    |
| NC_037331.1    | 46650427  | 0.188   | G   | *   | 8         | 0.889   | 9         | RINT1     |
| NC_037337.1    | 64817860  | 0.188   | A   | G   | 8         | 0.944   | 9         | SQOR      |
| NC_037342.1    | 20284619  | 0.222   | T   | A   | 9         | 0.813   | 8         | RDX       |
| NC_037329.1    | 120204692 | 0.222   | C   | G   | 9         | 0.833   | 9         | EIF4E2    |
| NC_037339.1    | 48775901  | 0.222   | C   | T   | 9         | 0.833   | 9         | KLF12     |
| NC_037330.1    | 105902539 | 0.222   | G   | C   | 9         | 0.875   | 8         | RLF       |
| NC_037334.1    | 66114681  | 0.222   | C   | T   | 9         | 0.875   | 8         | MRPL22    |
| NC_037335.1    | 83038346  | 0.222   | T   | C   | 9         | 0.875   | 8         | SLC35D2   |
| NC_037337.1    | 92496081  | 0.222   | C   | T   | 9         | 0.889   | 9         | GTF2A1    |
| NC_037346.1    | 63148591  | 0.222   | C   | T   | 9         | 0.944   | 9         | HELZ      |
| NC_037328.1    | 111780525 | 0.25    | G   | A   | 8         | 0.813   | 8         | GMPS      |
| NC_037329.1    | 23544011  | 0.25    | C   | G   | 8         | 0.813   | 8         | MAP3K20   |
| NC_037329.1    | 135215532 | 0.25    | T   | C   | 8         | 0.813   | 8         | RCC2      |
| NC_037330.1    | 2063880   | 0.25    | G   | A   | 8         | 0.813   | 8         | POGK      |
| NC_037334.1    | 21014556  | 0.25    | G   | C   | 8         | 0.813   | 8         | GNG7      |
| NC_037346.1    | 7670916   | 0.25    | A   | G   | 8         | 0.813   | 8         | DGKE      |
| NC_037353.1    | 33570520  | 0.25    | G   | T   | 8         | 0.813   | 8         | TCF7L2    |
| NC_037329.1    | 125367162 | 0.25    | G   | T   | 8         | 0.833   | 9         | EYA3      |
| NC_037337.1    | 92483283  | 0.25    | C   | T   | 8         | 0.833   | 9         | GTF2A1    |
| NC_037344.1    | 65492804  | 0.25    | T   | C   | 8         | 0.833   | 9         | GRK3      |
| NC_037328.1    | 64824563  | 0.25    | T   | C   | 8         | 0.875   | 8         | GSK3B     |
| NC_037330.1    | 105957688 | 0.25    | A   | C   | 8         | 0.875   | 8         | RLF       |
| NC_037331.1    | 19246835  | 0.25    | A   | C   | 8         | 0.875   | 8         | PHF14     |
| NC_037332.1    | 73548133  | 0.25    | C   | T   | 8         | 0.875   | 8         | TOM1      |
| NC_037332.1    | 112619591 | 0.25    | T   | C   | 8         | 0.875   | 8         | POLR3H    |
| NC_037343.1    | 66006047  | 0.25    | A   | G   | 8         | 0.889   | 9         | FAM129A   |
| NC_037346.1    | 61782120  | 0.25    | T   | C   | 8         | 0.889   | 9         | WIP1      |
| NC_037346.1    | 61782120  | 0.25    | T   | C   | 8         | 0.889   | 9         | ARSG*     |
| NW_020190994.1 | 553435    | 0.25    | A   | T   | 8         | 0.938   | 8         | LOC521568 |
| NC_037346.1    | 63193439  | 0.25    | C   | T   | 8         | 0.944   | 9         | HELZ      |
| NC_037329.1    | 118618124 | 0.25    | A   | C   | 8         | 1       | 8         | CAB39     |
| NC_037330.1    | 105958999 | 0.278   | C   | G   | 9         | 0.813   | 8         | RLF       |

|             |           |       |   |   |   |       |   |         |
|-------------|-----------|-------|---|---|---|-------|---|---------|
| NC_037332.1 | 119573540 | 0.278 | A | C | 9 | 0.813 | 8 | SELENOO |
| NC_037333.1 | 12106029  | 0.278 | T | C | 9 | 0.813 | 8 | CAMK2D  |
| NC_037336.1 | 38967523  | 0.278 | T | C | 9 | 0.813 | 8 | REV3L   |
| NC_037338.1 | 75057697  | 0.278 | C | G | 9 | 0.813 | 8 | UBXN2A  |
| NC_037332.1 | 74754774  | 0.278 | T | A | 9 | 0.833 | 9 | MYH9    |
| NC_037332.1 | 75664664  | 0.278 | G | T | 9 | 0.833 | 9 | RAC2    |
| NC_037337.1 | 12778812  | 0.278 | A | G | 9 | 0.833 | 9 | MEGF11  |
| NC_037346.1 | 63190965  | 0.278 | A | G | 9 | 0.938 | 8 | HELZ    |
| NC_037332.1 | 112598940 | 0.278 | T | C | 9 | 1     | 9 | ACO2    |

## B

| CHR         | SNP       | MAF pos | REF | ALT | No pos_ID | MAF neg | No neg_ID | Gene         |
|-------------|-----------|---------|-----|-----|-----------|---------|-----------|--------------|
| NC_037330.1 | 9582229   | 0.889   | T   | C   | 9         | 0.056   | 9         | IGSF8*       |
| NC_037332.1 | 68183061  | 0.944   | T   | C   | 9         | 0.056   | 9         | CHST11*      |
| NC_037333.1 | 90332951  | 1       | C   | *   | 9         | 0.056   | 9         | RCHY1        |
| NC_037338.1 | 66633374  | 0.944   | C   | G   | 9         | 0.056   | 9         | PPP3R1       |
| NC_037338.1 | 99480186  | 1       | C   | T   | 9         | 0.056   | 9         | NUP188       |
| NC_037343.1 | 67418274  | 0.938   | A   | C   | 8         | 0.056   | 9         | TPR*         |
| NC_037343.1 | 67431369  | 0.938   | C   | A   | 8         | 0.056   | 9         | TPR*         |
| NC_037345.1 | 65565962  | 0.813   | T   | G   | 8         | 0.056   | 9         | ZNF274       |
| NC_037348.1 | 69243133  | 0.938   | G   | C   | 8         | 0.056   | 9         | AKT1*        |
| NC_037349.1 | 1460473   | 0.813   | G   | A   | 8         | 0.056   | 9         | SEC61G       |
| NC_037350.1 | 15736092  | 1       | T   | C   | 8         | 0.056   | 9         | CCND3        |
| NC_037351.1 | 34511012  | 0.938   | T   | A   | 8         | 0.056   | 9         | MIB1         |
| NC_037332.1 | 98033207  | 0.889   | T   | C   | 9         | 0.063   | 8         | ETV6*        |
| NC_037332.1 | 9325814   | 0.833   | C   | T   | 9         | 0.111   | 9         | PPP1R12A     |
| NC_037334.1 | 70585950  | 0.875   | G   | C   | 8         | 0.111   | 9         | EBF1*        |
| NC_037335.1 | 80834582  | 0.813   | C   | T   | 8         | 0.111   | 9         | DAPK1        |
| NC_037344.1 | 62560799  | 0.875   | T   | A   | 8         | 0.111   | 9         | RPLP0        |
| NC_037334.1 | 17327616  | 1       | G   | T   | 8         | 0.125   | 8         | LOC112447353 |
| NC_037335.1 | 41692579  | 0.833   | A   | C   | 9         | 0.167   | 9         | PUM3         |
| NC_037346.1 | 61874326  | 0.813   | C   | A   | 8         | 0.167   | 9         | SLC16A6      |
| NC_037346.1 | 61874326  | 0.813   | C   | A   | 8         | 0.167   | 9         | ARSG*        |
| NC_037328.1 | 52952052  | 0.833   | T   | G   | 9         | 0.188   | 8         | IFT57        |
| NC_037329.1 | 4770561   | 0.875   | C   | A   | 8         | 0.188   | 8         | WDR33        |
| NC_037333.1 | 58212143  | 0.889   | C   | G   | 9         | 0.188   | 8         | TMEM156*     |
| NC_037330.1 | 45990080  | 0.938   | C   | T   | 8         | 0.222   | 9         | DPYD         |
| NC_037334.1 | 54231683  | 0.833   | A   | G   | 9         | 0.222   | 9         | ARHGAP26     |
| NC_037340.1 | 18000820  | 0.813   | T   | C   | 8         | 0.222   | 9         | APBB1IP      |
| NC_037340.1 | 18000848  | 0.813   | CA  | TA  | 8         | 0.222   | 9         | APBB1IP      |
| NC_037340.1 | 18000913  | 0.813   | G   | A   | 8         | 0.222   | 9         | APBB1IP      |
| NC_037349.1 | 51327126  | 0.938   | A   | G   | 8         | 0.222   | 9         | PFKFB4       |
| NC_037352.1 | 631269    | 0.813   | T   | C   | 8         | 0.222   | 9         | NARFL        |
| NC_037333.1 | 98245426  | 0.813   | G   | A   | 8         | 0.25    | 8         | ABRAXAS1     |
| NC_037330.1 | 6649228   | 0.833   | G   | T   | 9         | 0.278   | 9         | HSD17B7      |
| NC_037330.1 | 14874291  | 0.889   | G   | C   | 9         | 0.278   | 9         | SYT11        |
| NC_037334.1 | 14191941  | 0.944   | A   | C   | 9         | 0.278   | 9         | ZNF699       |
| NC_037338.1 | 100376121 | 0.813   | C   | G   | 8         | 0.278   | 9         | FNBP1        |
| NC_037340.1 | 12673908  | 0.813   | C   | T   | 8         | 0.278   | 9         | USP6NL       |
| NC_037344.1 | 16795936  | 0.813   | G   | A   | 8         | 0.278   | 9         | RNF150       |
