# Supplementary material for: Transcriptomic Analysis of Circulating Leukocytes Obtained during the Recovery from Clinical Mastitis Caused by Escherichia coli in Holstein Dairy Cows
Source: MDPI journal article supplement (doi:10.3390/ani12162146), 2022-08-21
Supplement: s1 [file s1]

Table S1. Animal Information.

| Experiment ID | Lactation No. | 305-d Milk yield (kg) | DIM | Interval (d) from <i>E. coli</i> diagnosis to sampling | Treated for <i>E. coli</i> infection | Udder Health (if not <i>E. coli</i> )                              | Group for analysis       |
|---------------|---------------|-----------------------|-----|--------------------------------------------------------|--------------------------------------|--------------------------------------------------------------------|--------------------------|
| A4            | 4             | 10401                 | 106 | 6                                                      | YES                                  | NA                                                                 | <i>E. coli</i> (+) EARLY |
| A2            | 1             | 8972                  | 133 | 8                                                      | NO                                   | NA                                                                 | <i>E. coli</i> (+) EARLY |
| A9            | 1             | 9649                  | 149 | 8                                                      | YES                                  | NA                                                                 | <i>E. coli</i> (+) EARLY |
| A10           | 1             | 8735                  | 139 | 8                                                      | YES                                  | NA                                                                 | <i>E. coli</i> (+) EARLY |
| A8            | 2             | 9247                  | 96  | 15                                                     | YES                                  | NA                                                                 | <i>E. coli</i> (+) EARLY |
| A3            | 1             | 9745                  | 19  | 17                                                     | YES                                  | NA                                                                 | <i>E. coli</i> (+) EARLY |
| A1            | 4             | 10211                 | 205 | 27                                                     | YES                                  | NA                                                                 | <i>E. coli</i> (+) LATE  |
| A5            | 4             | 11230                 | 155 | 48                                                     | YES                                  | NA                                                                 | <i>E. coli</i> (+) LATE  |
| A17           | 2             | 10322                 | 193 | 65                                                     | YES                                  | NA                                                                 | <i>E. coli</i> (+) LATE  |
| A7#           | 1             | 8746                  | 39  | 44                                                     | NO                                   | NA                                                                 |                          |
| A11           | 1             | 10277                 | 116 | NA                                                     | NA                                   | No germ history                                                    | <i>E. coli</i> (-) CONT  |
| A12           | 1             | 9840                  | 201 | NA                                                     | NA                                   | No germ history                                                    | <i>E. coli</i> (-) CONT  |
| A13           | 2             | 10876                 | 88  | NA                                                     | NA                                   | No germ history                                                    | <i>E. coli</i> (-) CONT  |
| A14           | 2             | 9967                  | 59  | NA                                                     | NA                                   | No germ history                                                    | <i>E. coli</i> (-) CONT  |
| A15           | 3             | 10675                 | 79  | NA                                                     | NA                                   | No germ history                                                    | <i>E. coli</i> (-) CONT  |
| A16           | 3             | 11335                 | 89  | NA                                                     | NA                                   | Missing                                                            | <i>E. coli</i> (-) CONT  |
| A6‡           | 2             | 9872                  | 93  | NA                                                     | NA                                   | Unspecific Streptococci, Unspecific Enterobacter, Unspecific germs | <i>E. coli</i> (-) CONT‡ |
| A18‡          | 4             | 11488                 | 81  | NA                                                     | NA                                   | Unspecific germs                                                   | <i>E. coli</i> (-) CONT‡ |
| A19‡          | 9             | 10341                 | 205 | NA                                                     | NA                                   | Unspecific Streptococci, Unspecific Enterobacter, Unspecific germs | <i>E. coli</i> (-) CONT‡ |

DIM, days in milk; NA, not applicable; # Cow A7 omitted from all analyses as it had no clinical symptoms; ‡ Cows A6, A18 and A19 omitted from RNAseq analysis due to presence of udder infections other than *E. coli*.
