# Supplementary material for: Transcriptomic Analysis of Circulating Leukocytes Obtained during the Recovery from Clinical Mastitis Caused by Escherichia coli in Holstein Dairy Cows
Source: MDPI journal article supplement (doi:10.3390/ani12162146), 2022-08-21
Supplement: s1 [file s1]

**Supplementary Table S6.** Annotation of variants identified in genes having differential expression between *E. coli*(+) and *E. coli*(-).

| Gene            | BT<br>A | SNP       | MAF<br>POS | REF | AL<br>T | +ve<br>cows<br>(n) | MAF<br>NEG | -ve<br>cows<br>(n) | Consequence                | Impact   | Gene_ensembl       | Existing varn |
|-----------------|---------|-----------|------------|-----|---------|--------------------|------------|--------------------|----------------------------|----------|--------------------|---------------|
| <i>EYA3</i>     | 2       | 125367162 | 0.25       | G   | T       | 8                  | 0.833      | 9                  | intron_variant             | MODIFIER | ENSBTAG00000043989 | rs110270588   |
| <i>RAC2</i>     | 5       | 75664664  | 0.278      | G   | T       | 9                  | 0.833      | 9                  | intron_variant             | MODIFIER | ENSBTAG00000011043 | rs137621320   |
| <i>GNG7</i>     | 7       | 21014556  | 0.25       | G   | C       | 8                  | 0.813      | 8                  | intron_variant             | MODIFIER | ENSBTAG00000007644 | rs209187815   |
| <i>ARHGAP26</i> | 7       | 54231683  | 0.833      | A   | G       | 9                  | 0.222      | 9                  | intron_variant             | MODIFIER | ENSBTAG00000027151 | rs42350004    |
| <i>EBF1*</i>    | 7       | 70585950  | 0.063      | G   | T       | 8                  | 0.833      | 9                  | intron_variant             | MODIFIER | ENSBTAG00000037508 |               |
| <i>EBF1*</i>    | 7       | 70585950  | 0.875      | G   | C       | 8                  | 0.111      | 9                  | intron_variant             | MODIFIER | ENSBTAG00000037508 | rs41656037    |
| <i>FAM129A</i>  | 16      | 66006047  | 0.25       | A   | G       | 8                  | 0.889      | 9                  | intron_variant             | MODIFIER | ENSBTAG00000014548 | rs41817426    |
| <i>WIP1</i>     | 19      | 61782120  | 0.25       | T   | C       | 8                  | 0.889      | 9                  | downstream gene<br>variant | MODIFIER | ENSBTAG00000010637 | rs41928661    |
| <i>ARSG*</i>    | 19      | 61782120  | 0.25       | T   | C       | 8                  | 0.889      | 9                  | intron_variant             | MODIFIER | ENSBTAG00000039556 | rs41928661    |
| <i>ARSG*</i>    | 19      | 61874326  | 0.813      | C   | A       | 8                  | 0.167      | 9                  | intron_variant             | MODIFIER | ENSBTAG0000003074  | rs450146987   |
| <i>SLC16A6</i>  | 19      | 61874326  | 0.813      | C   | A       | 8                  | 0.167      | 9                  | intron_variant             | MODIFIER | ENSBTAG00000010637 | rs450146987   |
| <i>PFKFB4</i>   | 22      | 51327126  | 0.938      | A   | G       | 8                  | 0.222      | 9                  | intron_variant             | MODIFIER | ENSBTAG00000006752 | rs42013635    |
| <i>BOLA-DOA</i> | 23      | 7314809   | 0.063      | T   | G       | 8                  | 0.889      | 9                  | downstream gene<br>variant | MODIFIER | ENSBTAG00000006490 | Not reported  |
| <i>CCND3</i>    | 23      | 15736092  | 1          | T   | C       | 8                  | 0.056      | 9                  | intergenic_variant         | MODIFIER | Not reported       | rs110778610   |
